# Supplementary material
Source: PubMed Central journal article supplement (PMC2827952)
Supplement: JCI40094sd.pdf [file JCI40094sd.pdf]

# Replication of Hepatitis B and C Virus in

## Human Liver Chimeric Mice

Karl-Dimiter Bissig, Stefan F. Wieland, Phu Tran, Masanori Isogawa, Tam T. Le,  
Francis V. Chisari, and Inder M. Verma

*The Salk Institute for Biological Studies, Laboratory of Genetics, 10010 North Torrey  
Pines Road, La Jolla, CA 92037 USA*

*The Scripps Research Institute, Department of Immunology and Microbial Science  
10550 North Torrey Pines Road, La Jolla, CA 92037, USA*

## Supplementary Material

### Supplementary Methods

#### **Treatment of HBV infected human liver chimeric mice with adefovir dipivoxil:**

Chimeric *fah<sup>-/-</sup>/rag-2<sup>-/-</sup>/il-2rg<sup>-/-</sup>* mice were injected with  $1 \times 10^8$  GE HBV, genotype D (serotype ayw) into the tail vein. The inoculum was derived from the serum of an HBV-infected chimpanzee and diluted in PBS to a volume of 200  $\mu$ .

After 6 weeks when plateau phase of HBV DNA in the serum was reached, animals were treated with adefovir dipivoxil (4mg/kg/day in 0.05 M citric acid, oral gavage once daily) or citric acid only.

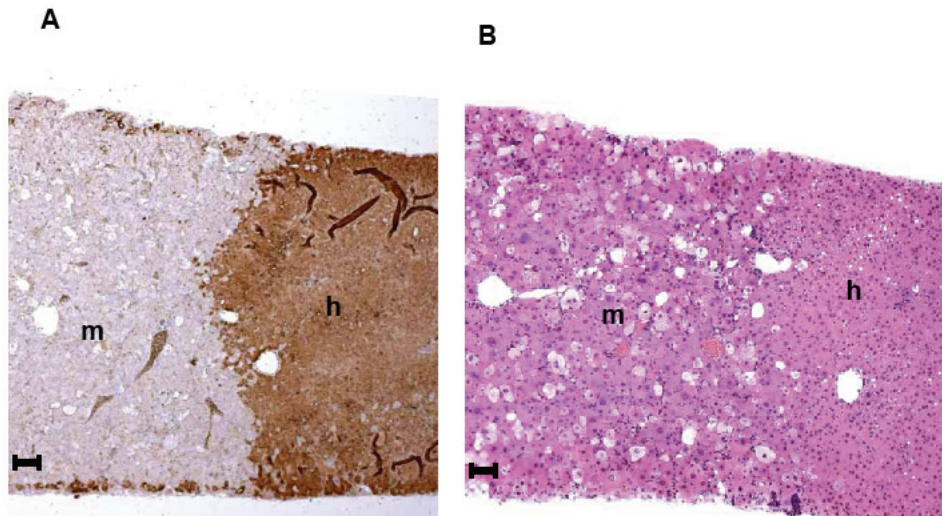

**Supplemental Figure 1.** Histological appearance of HBV infected chimeric mouse liver. **(A)** Immunostaining for FAH showing positive human (h) tissue and nonreactive mouse (m) tissue. **(B)** Serial section of **(A)** with H&E staining showing infiltration and cell death of mouse tissue, while the human counterpart shows normal liver tissue. Scale bar is 50  $\mu$ m.

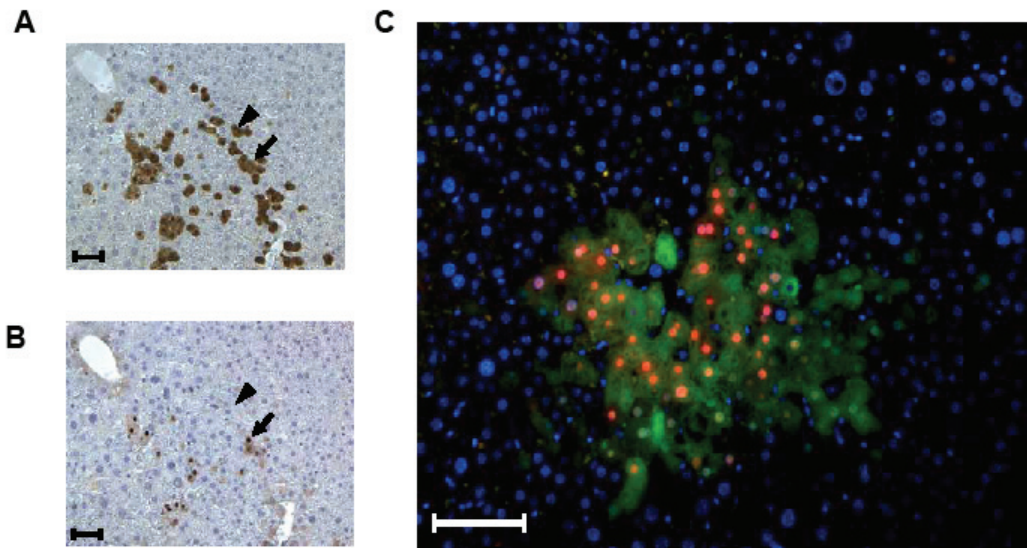

**Supplemental Figure 2** HBV infection of mice with low human chimerism. **(A)** Immunostaining of the liver for FAH and/or HBcAg. Serial sections of the same cluster of human hepatocytes stained for FAH **(A)** and HBcAg **(B)**. The arrow points to cells that are stained by both antibodies and the arrowhead to cells that are stained by FAH only. **(C)** Fluorescent co-staining of a hepatocyte cluster for FAH {green} and HBcAg {red}. The cellular distribution of FAH is mainly cytoplasmic while HBcAg shows a strong nuclear and faint cytoplasmic staining.

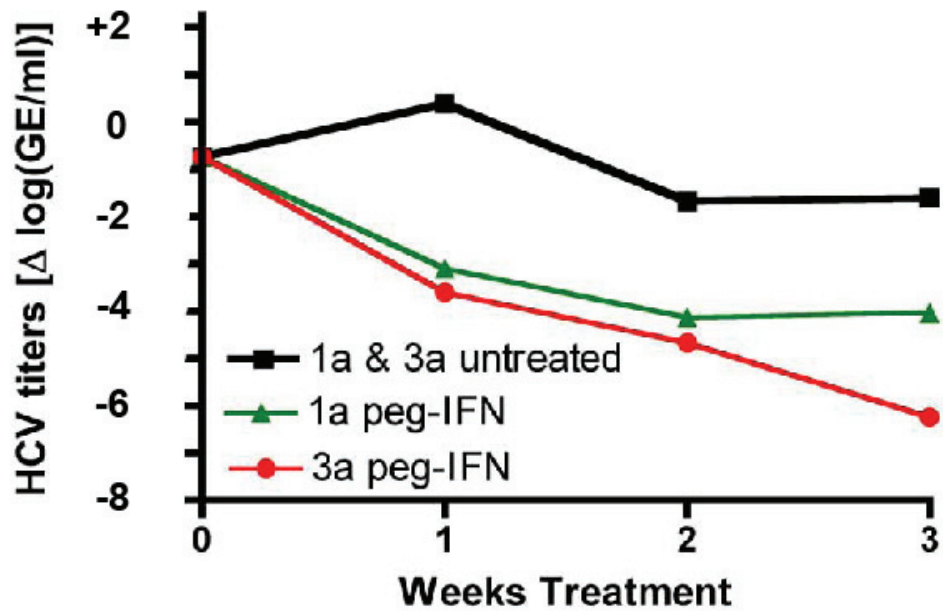

**Supplemental Figure 3.** Treatment of HCV genotype 1a and 3a with peg-IFN. Data points represent normalized, mean HCV titers of HCV-1a (n=3), HCV-3a (n=2) treated with peg-IFN and untreated control group (n=4 HCV genotype 1a & 3a).

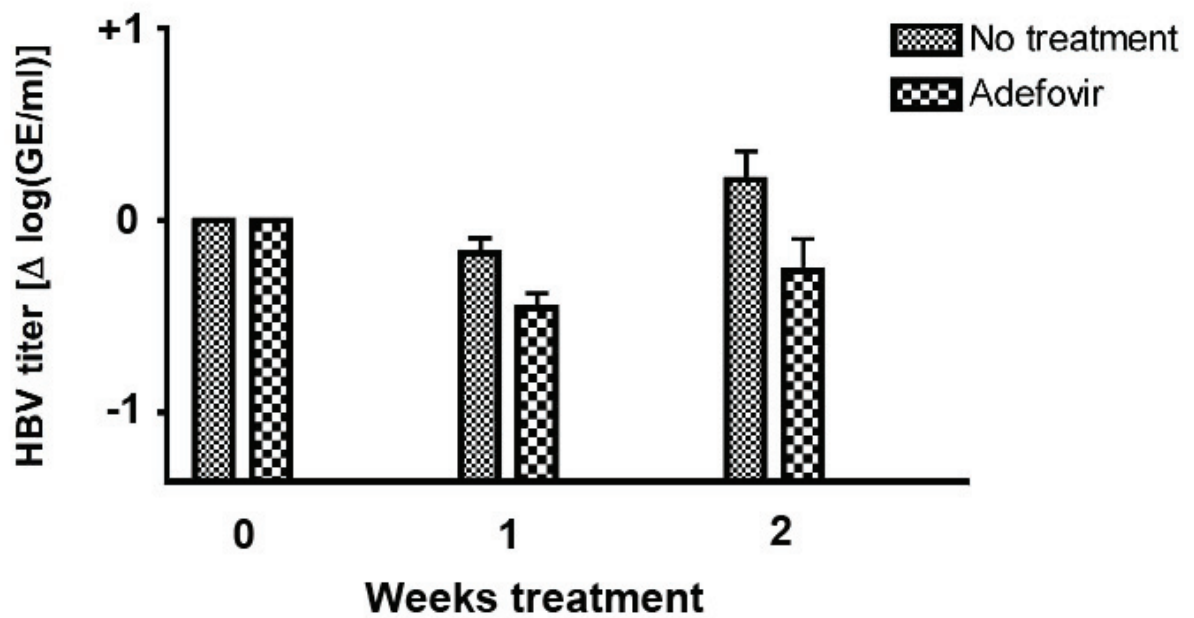

**Supplemental Figure 4.** Treatment of HBV infected human chimeric mice with adefovir dipivoxil. Histograms represent normalized mean values of treated (n=3) and untreated group (n=3)

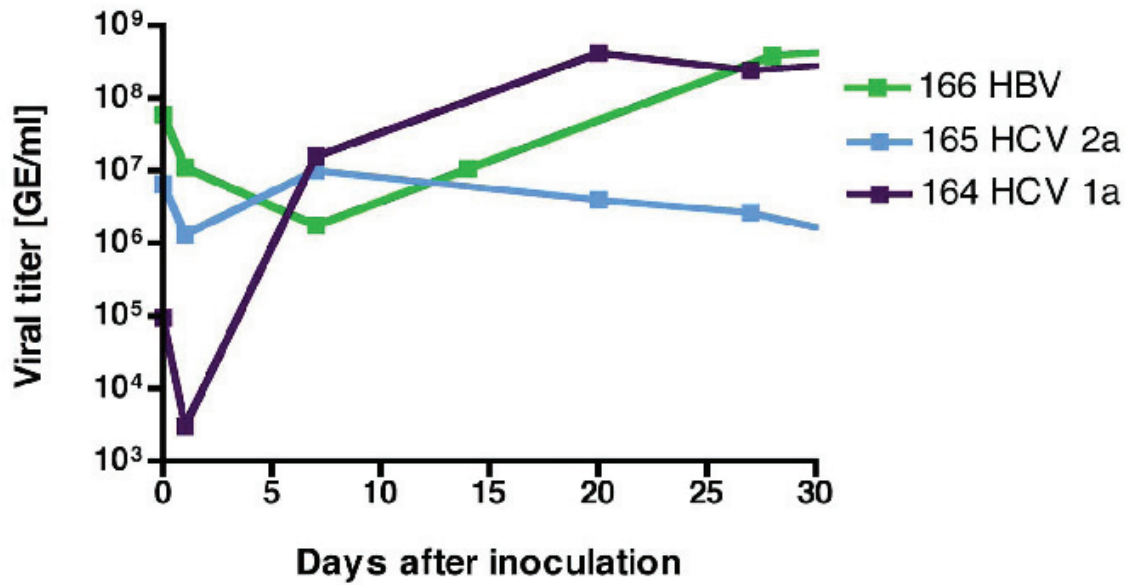

**Supplemental Figure 5.** Viral titers in the serum of HBV and HCV (genotype 1a and 2a) infected chimeric mice. All three mice have been repopulated with hepatocytes of the same donor.

**Supplemental table 1**

Donor information for human hepatocyte transplantation

| <b>Donor</b> | <b>Age</b> | <b>Race</b>      | <b>Sex</b> | <b>BMI [kg/m<sup>2</sup>]</b> |
|--------------|------------|------------------|------------|-------------------------------|
| A            | 44         | Caucasian        | female     | normal                        |
| B            | 67         | Caucasian        | female     | normal                        |
| C            | 20         | African American | female     | normal                        |
| D            | 48         | Caucasian        | female     | normal                        |
| E            | 61         | African American | female     | normal                        |
| F            | 4          | Caucasian        | male       | not analyzed                  |
| G            | 64         | Caucasian        | female     | normal                        |
| H            | 47         | Caucasian        | female     | 19                            |
| I            | 24         | Caucasian        | female     | 27                            |
| J            | 44         | Caucasian        | female     | normal                        |
| K            | 58         | Caucasian        | male       | 26                            |
| L            | 18         | Caucasian        | female     | obese                         |

**Supplemental table 2**

Repopulation rates of different donors and viruses

| <b>Animal #</b> | <b>IHC<sup>a</sup></b> | <b>Donor</b> | <b>Virus</b> |
|-----------------|------------------------|--------------|--------------|
| 164             | 80%                    | A            | HCV-1a       |
| 195             | 40%                    | D            | HCV-1a       |
| 165             | 20%                    | A            | HCV-2a       |
| 179             | 30%                    | B            | HCV-2a       |
| 184             | 30%                    | B            | HCV-2a       |
| 187             | 40%                    | B            | HCV-2a       |
| 193             | 80%                    | C            | HCV-2a       |
| 205             | 70%                    | E            | HCV-1a/2a    |
| 206             | 70%                    | F            | HCV-1b/2b    |
| 166             | 30%                    | A            | HBV          |
| 170             | 70%                    | A            | HBV          |
| 172             | 20%                    | B            | HBV          |
| 197             | 80%                    | F            | HBV          |

<sup>a</sup> IHC with anti-FAH, percentage reflect human chimerism in mouse liver
